# Supplementary material
Source: MDPI journal article supplement (https://www.mdpi.com/2073-4352/14/1/28)
Supplement: s1 [file s1]

## Support information

### The Effect of Temperature on the Surface Energetic Properties of Carbon Fibers using Inverse Gas Chromatography

Tayssir Hamieh<sup>1,2</sup>

<sup>1</sup>Faculty of Science and Engineering, Maastricht University, P.O. Box 616, 6200 MD Maastricht, Netherlands, E-mail: t.hamieh@maastrichtuniversity.nl

<sup>2</sup>Laboratory of Materials, Catalysis, Environment and Analytical Methods Laboratory (MCEMA), Faculty of Sciences, Lebanese University, 1533, Hadath, Lebanon

#### Surface area of n-alkanes

Knowing that the surface area of organic solvents depends on the chosen molecular model, one presented on Table S1, the values corresponding to the different models.

**Table S1.** Surface areas of various molecules (in Å<sup>2</sup>) given by the various models of Van der Waals (VDW), Redlich-Kwong (R-K), Kiselev, geometric, cylindrical or spherical models.

| Molecules                      | VDW  | Kiselev | Cylindrical | R-K  | Spherical | Geometric |
|--------------------------------|------|---------|-------------|------|-----------|-----------|
| C <sub>6</sub> H <sub>14</sub> | 52.7 | 51.5    | 45.5        | 41.3 | 39.6      | 40.7      |
| C <sub>7</sub> H <sub>16</sub> | 59.2 | 57      | 51.8        | 46.4 | 42.7      | 48.5      |
| C <sub>8</sub> H <sub>18</sub> | 64.9 | 63      | 58.1        | 50.8 | 45.7      | 56.2      |
| C <sub>9</sub> H <sub>20</sub> | 69.6 | 69      | 64.4        | 54.5 | 48.7      | 64.0      |

#### Expressions of the dispersive components of the surface energy of n-alkanes

The general expressions  $\gamma_{lX}^d(T)$  of the London dispersive component of the surface energy of organic molecule (denoted X) can be given by a linear relation in the usual domain of the temperature with an excellent linear regression coefficient approaching 1.0000

$$\gamma_{lX}^d(T) = \varepsilon_X T + \gamma_{lX}^d(0K); \varepsilon_X = \frac{d\gamma_{lX}^d}{dT} \quad (1)$$

Where  $\varepsilon_X$  is the surface entropy of the molecule X and  $\gamma_{lX}^d(0K)$  the London dispersive surface energy of the solvent extrapolated to 0K.  $\varepsilon_X$  and  $\gamma_{lX}^d(0K)$  are constants only depending on the solvent nature.

On Table S2, one gave the two parameters  $\varepsilon_X$  and  $\gamma_{lX}^d(0K)$  of the straight lines representing

$\gamma_{lx}^d(T)$  for the different used n-alkanes. The values on Table 1 proved that the slope of the linear equations is negative showing a decrease of the London dispersive surface energy when the temperature increases.

**Table S2.** Values of the surface entropy  $\varepsilon_x$  (in  $mJ/(K \times m^2)$ ) and  $\gamma_{lx}^d(0K)$  (in  $mJ/m^2$ ) of the n-alkanes

| Molecule X | $\varepsilon_x$ | $\gamma_{lx}^d(0K)$ |
|------------|-----------------|---------------------|
| C5         | -0.110          | 48.33               |
| C6         | -0.102          | 48.34               |
| C7         | -0.098          | 48.85               |
| C8         | -0.095          | 49.48               |
| C9         | -0.093          | 50.26               |
| C10        | -0.092          | 50.79               |

### Characteristics of the used polar molecules

Different polar molecules were used in this study. Their characteristics are presented on Table S3.

**Table S3.** Normalized donor and acceptor numbers of some polar molecules.

| polar probe                     | DN'   | AN'  | DN'/AN' | Character         |
|---------------------------------|-------|------|---------|-------------------|
| CCl <sub>4</sub>                | 0     | 2.3  | 0       | Acid              |
| CHCl <sub>3</sub>               | 0     | 18.7 | 0.00    | Higher acidity    |
| CH <sub>2</sub> Cl <sub>2</sub> | 3     | 13.5 | 0.22    | Acid              |
| Benzene                         | 0.25  | 0.6  | 0.42    | Weaker amphoteric |
| Acetone                         | 42.5  | 8.7  | 4.89    | Higher amphoteric |
| Ethyl acetate                   | 42.75 | 5.3  | 8.07    | Base              |
| Diethyl ether                   | 48    | 4.9  | 9.80    | Base              |
| THF                             | 50    | 1.9  | 26.32   | Higher basicity   |

### Retention volume of the different molecules adsorbed on carbon fibers

**Table S4.** Values of  $RT \ln V_n$  (in kJ/mol) of the various polar solvents adsorbed on untreated carbon fibers (a) as a function of the temperature.

| T(K) | 313.15 | 323.15 | 333.15 | 343.15 | 353.15 | 363.15 | 373.15 |
|------|--------|--------|--------|--------|--------|--------|--------|
| C6   | 0.591  | 0.388  | 0.185  | -0.018 | -0.221 | -0.424 | -0.627 |
| C7   | 3.859  | 3.589  | 3.319  | 3.049  | 2.779  | 2.509  | 2.239  |
| C8   | 6.487  | 6.244  | 6.001  | 5.758  | 5.515  | 5.272  | 5.029  |
| C9   | 9.917  | 9.494  | 9.101  | 8.686  | 8.285  | 7.984  | 7.734  |

|                      |        |        |        |        |        |        |        |
|----------------------|--------|--------|--------|--------|--------|--------|--------|
| <b>CCl4</b>          | 1.830  | 1.760  | 1.690  | 1.626  | 1.564  | 1.500  | 1.442  |
| <b>CH2Cl2</b>        | -2.639 | -2.911 | -3.212 | -3.517 | -3.851 | -4.279 | -4.787 |
| <b>CHCl3</b>         | 11.181 | 10.463 | 9.653  | 8.741  | 7.642  | 6.137  | 3.682  |
| <b>Ether</b>         | -1.970 | -2.305 | -2.668 | -3.019 | -3.389 | -3.848 | -4.362 |
| <b>THF</b>           | 5.562  | 5.107  | 4.651  | 4.197  | 3.743  | 3.282  | 2.820  |
| <b>Benzene</b>       | 5.709  | 5.441  | 5.183  | 4.919  | 4.659  | 4.428  | 4.213  |
| <b>Ethyl acetate</b> | 5.326  | 5.092  | 4.860  | 4.634  | 4.412  | 4.191  | 3.982  |
| <b>Acetone</b>       | 1.539  | 1.308  | 1.065  | 0.841  | 0.616  | 0.348  | 0.071  |

**Table S5.** Values of  $RT\ln V_n$  (in kJ/mol) of the various polar solvents adsorbed on oxidized carbon fibers (b) as a function of the temperature.

| <b>T(K)</b>          | <b>313.15</b> | <b>323.15</b> | <b>333.15</b> | <b>343.15</b> | <b>353.15</b> | <b>363.15</b> | <b>373.15</b> |
|----------------------|---------------|---------------|---------------|---------------|---------------|---------------|---------------|
| <b>C6</b>            | 1.211         | 1.143         | 1.061         | 0.979         | 0.897         | 0.815         | 0.733         |
| <b>C7</b>            | 4.409         | 4.139         | 3.869         | 3.599         | 3.329         | 3.059         | 2.789         |
| <b>C8</b>            | 7.192         | 6.814         | 6.436         | 6.058         | 5.680         | 5.302         | 4.924         |
| <b>C9</b>            | 10.445        | 10.107        | 9.769         | 9.431         | 9.093         | 8.755         | 8.417         |
| <b>CCl4</b>          | 3.505         | 3.427         | 3.341         | 3.256         | 3.173         | 3.090         | 3.009         |
| <b>CH2Cl2</b>        | 4.441         | 4.238         | 4.035         | 3.832         | 3.629         | 3.426         | 3.223         |
| <b>CHCl3</b>         | 9.763         | 9.484         | 9.205         | 8.926         | 8.647         | 8.368         | 8.089         |
| <b>Ether</b>         | 3.941         | 3.738         | 3.535         | 3.332         | 3.129         | 2.926         | 2.723         |
| <b>THF</b>           | 11.359        | 10.873        | 10.379        | 9.886         | 9.394         | 8.902         | 8.411         |
| <b>Benzene</b>       | 8.182         | 7.919         | 7.652         | 7.386         | 7.120         | 6.855         | 6.590         |
| <b>Ethyl acetate</b> | 9.662         | 9.432         | 9.202         | 8.972         | 8.742         | 8.512         | 8.282         |
| <b>Acetone</b>       | 9.379         | 9.082         | 8.785         | 8.488         | 8.191         | 7.894         | 7.597         |

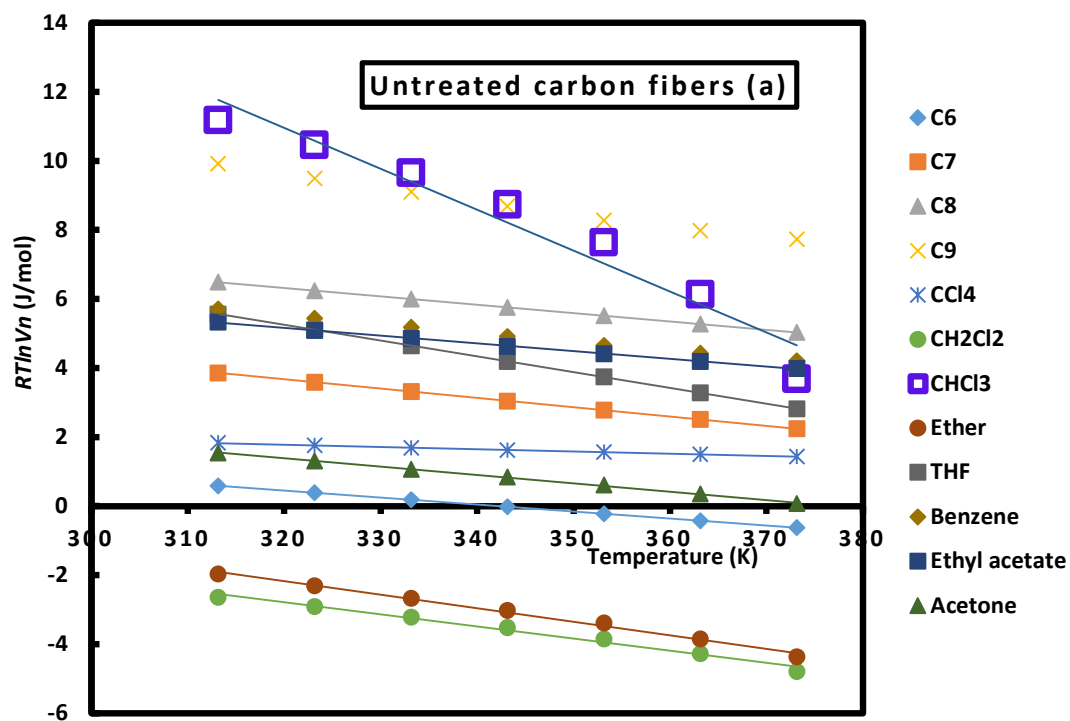

**Figure S1.** Variations of  $RT\ln V_n$  of the various solvents adsorbed on untreated carbon fibers (a) as a function of the temperature.

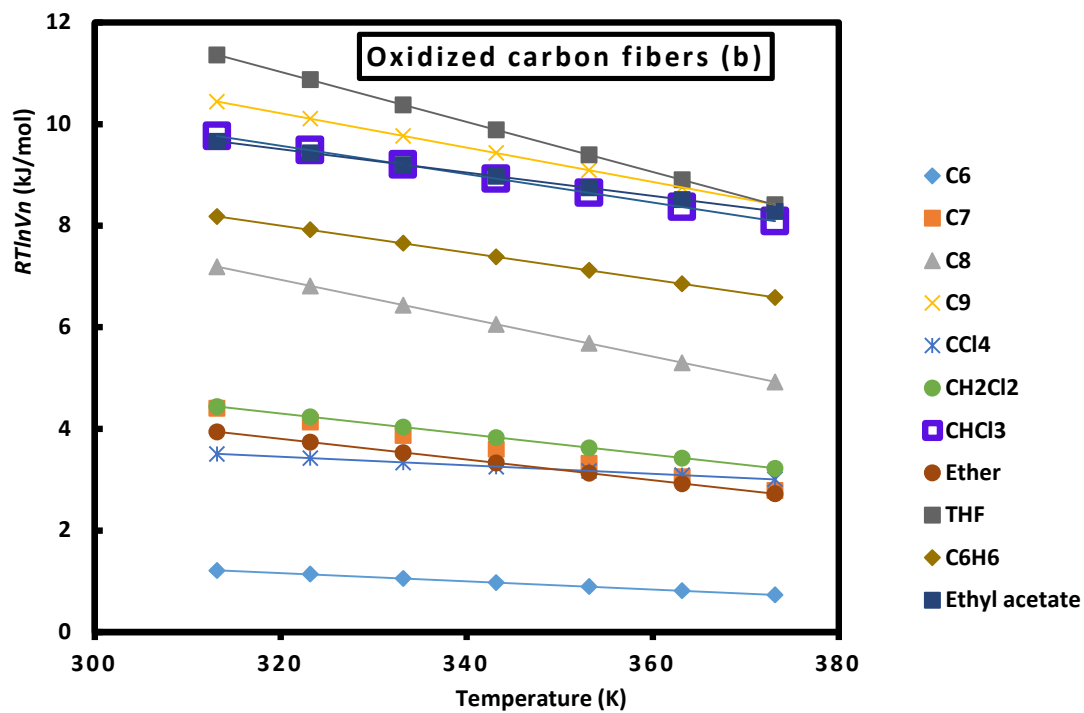

**Figure S2.** Variations of  $RT\ln V_n$  of the various solvents adsorbed on oxidized carbon fibers (b) as a function of the temperature.

**Table S6.** Values of ( $\Delta G_a^{sp}(T)$ ) (in kJ/mol) of the various polar solvents adsorbed untreated carbon fibers (a) as a function of the temperature by using the various models and IGC methods.

| $\Delta G_a^{sp}(T)$<br>(in kJ/mol) | Kiselev |       |        |         |               |       |               |         |
|-------------------------------------|---------|-------|--------|---------|---------------|-------|---------------|---------|
| T(K)                                | CCl4    | CHCl3 | CH2Cl2 | Benzene | Diethyl ether | THF   | Ethyl acetate | Acetone |
| 313.15                              | 0.824   | 0.574 | 11.836 | 3.453   | 3.938         | 0.514 | 4.275         | 5.405   |
| 323.15                              | 0.816   | 0.554 | 12.022 | 3.170   | 3.666         | 0.506 | 4.050         | 5.052   |
| 333.15                              | 0.808   | 0.534 | 12.208 | 2.887   | 3.394         | 0.498 | 3.825         | 4.699   |
| 343.15                              | 0.800   | 0.514 | 12.394 | 2.604   | 3.122         | 0.490 | 3.600         | 4.346   |
| 353.15                              | 0.792   | 0.494 | 12.580 | 2.321   | 2.850         | 0.482 | 3.375         | 3.993   |
| 363.15                              | 0.784   | 0.474 | 12.766 | 2.038   | 2.578         | 0.474 | 3.150         | 3.640   |
| 373.15                              | 0.776   | 0.454 | 12.952 | 1.755   | 2.306         | 0.466 | 2.925         | 3.287   |

  

| $\Delta G_a^{sp}(T)$<br>(in kJ/mol) | Spherical |       |        |         |               |       |               |         |
|-------------------------------------|-----------|-------|--------|---------|---------------|-------|---------------|---------|
| T(K)                                | CCl4      | CHCl3 | CH2Cl2 | Benzene | Diethyl ether | THF   | Ethyl acetate | Acetone |
| 313.15                              | 1.586     | 3.200 | 15.423 | 3.028   | 7.271         | 5.282 | 6.767         | 7.380   |
| 323.15                              | 1.502     | 3.075 | 15.510 | 2.816   | 6.824         | 5.043 | 6.380         | 6.873   |
| 333.15                              | 1.423     | 2.959 | 15.607 | 2.606   | 6.386         | 4.818 | 6.002         | 6.373   |
| 343.15                              | 1.343     | 2.836 | 15.694 | 2.401   | 5.940         | 4.581 | 5.620         | 5.871   |
| 353.15                              | 1.264     | 2.715 | 15.785 | 2.199   | 5.495         | 4.347 | 5.241         | 5.371   |
| 363.15                              | 1.191     | 2.616 | 15.918 | 2.002   | 5.076         | 4.151 | 4.882         | 4.885   |
| 373.15                              | 1.119     | 2.526 | 16.107 | 1.813   | 4.664         | 3.967 | 4.530         | 4.404   |

  

| $\Delta G_a^{sp}(T)$<br>(in kJ/mol) | Geometric |       |        |         |               |       |               |         |
|-------------------------------------|-----------|-------|--------|---------|---------------|-------|---------------|---------|
| T(K)                                | CCl4      | CHCl3 | CH2Cl2 | Benzene | Diethyl ether | THF   | Ethyl acetate | Acetone |
| 313.15                              | 5.857     | 3.791 | 16.625 | 0.428   | 4.716         | 3.618 | 5.976         | 3.436   |
| 323.15                              | 5.722     | 3.494 | 16.108 | 0.266   | 4.421         | 3.510 | 5.758         | 3.217   |
| 333.15                              | 5.600     | 3.194 | 15.552 | 0.098   | 4.130         | 3.411 | 5.546         | 2.994   |
| 343.15                              | 5.464     | 2.873 | 14.912 | -0.063  | 3.836         | 3.303 | 5.328         | 2.775   |
| 353.15                              | 5.331     | 2.538 | 14.162 | -0.228  | 3.542         | 3.196 | 5.111         | 2.554   |
| 363.15                              | 5.242     | 2.198 | 13.211 | -0.416  | 3.255         | 3.116 | 4.911         | 2.321   |
| 373.15                              | 5.172     | 1.828 | 11.682 | -0.615  | 2.971         | 3.047 | 4.720         | 2.085   |

  

| $\Delta G_a^{sp}(T)$<br>(in kJ/mol) | VDW   |       |        |         |               |       |               |         |
|-------------------------------------|-------|-------|--------|---------|---------------|-------|---------------|---------|
| T(K)                                | CCl4  | CHCl3 | CH2Cl2 | Benzene | Diethyl ether | THF   | Ethyl acetate | Acetone |
| 297.95                              | 1.400 | 1.939 | 15.071 | 2.185   | 7.265         | 5.817 | 5.652         | 5.958   |
| 307.85                              | 1.364 | 1.846 | 14.993 | 1.992   | 6.844         | 5.588 | 5.369         | 5.577   |
| 313.45                              | 1.330 | 1.756 | 14.909 | 1.796   | 6.430         | 5.373 | 5.089         | 5.196   |
| 323.75                              | 1.294 | 1.660 | 14.800 | 1.606   | 6.006         | 5.142 | 4.806         | 4.813   |
| 333.45                              | 1.258 | 1.564 | 14.664 | 1.417   | 5.585         | 4.916 | 4.523         | 4.431   |
| 342.65                              | 1.225 | 1.471 | 14.489 | 1.219   | 5.186         | 4.729 | 4.250         | 4.050   |

|        |       |       |        |       |       |       |       |       |
|--------|-------|-------|--------|-------|-------|-------|-------|-------|
| 353.25 | 1.193 | 1.375 | 14.176 | 1.022 | 4.793 | 4.556 | 3.980 | 3.667 |
|--------|-------|-------|--------|-------|-------|-------|-------|-------|

  

| $\Delta G_a^{sp} (T)$<br>(in kJ/mol) | Redlich-Kwong (R-K) |       |        |         |               |       |               |         |
|--------------------------------------|---------------------|-------|--------|---------|---------------|-------|---------------|---------|
| T(K)                                 | CCl4                | CHCl3 | CH2Cl2 | Benzene | Diethyl ether | THF   | Ethyl acetate | Acetone |
| 313.15                               | 1.445               | 2.009 | 15.125 | 2.234   | 7.314         | 5.825 | 5.683         | 5.991   |
| 323.15                               | 1.407               | 1.912 | 15.045 | 2.038   | 6.890         | 5.595 | 5.398         | 5.607   |
| 333.15                               | 1.371               | 1.818 | 14.959 | 1.840   | 6.474         | 5.379 | 5.116         | 5.224   |
| 343.15                               | 1.332               | 1.718 | 14.846 | 1.647   | 6.048         | 5.148 | 4.831         | 4.840   |
| 353.15                               | 1.294               | 1.618 | 14.707 | 1.455   | 5.624         | 4.920 | 4.546         | 4.455   |
| 363.15                               | 1.259               | 1.521 | 14.530 | 1.255   | 5.222         | 4.732 | 4.271         | 4.071   |
| 373.15                               | 1.225               | 1.422 | 14.215 | 1.056   | 4.828         | 4.560 | 4.000         | 3.688   |

  

| $\Delta G_a^{sp} (T)$<br>(in kJ/mol) | Cylindrical |       |        |         |               |        |               |         |
|--------------------------------------|-------------|-------|--------|---------|---------------|--------|---------------|---------|
| T(K)                                 | CCl4        | CHCl3 | CH2Cl2 | Benzene | Diethyl ether | THF    | Ethyl acetate | Acetone |
| 313.15                               | 1.312       | 5.054 | 17.423 | 0.460   | 2.543         | -1.321 | 4.516         | 2.558   |
| 323.15                               | 1.304       | 4.717 | 16.978 | 0.334   | 2.334         | -1.254 | 4.308         | 2.340   |
| 333.15                               | 1.296       | 4.383 | 16.507 | 0.201   | 2.121         | -1.192 | 4.100         | 2.115   |
| 343.15                               | 1.288       | 4.027 | 15.967 | 0.080   | 1.913         | -1.124 | 3.891         | 1.897   |
| 353.15                               | 1.278       | 3.659 | 15.344 | -0.043  | 1.703         | -1.059 | 3.681         | 1.676   |
| 363.15                               | 1.273       | 3.303 | 14.581 | -0.184  | 1.483         | -1.008 | 3.474         | 1.433   |
| 373.15                               | 1.271       | 2.926 | 13.383 | -0.327  | 1.260         | -0.961 | 3.269         | 1.183   |

  

| $\Delta G_a^{sp} (T)$<br>(in kJ/mol) | Hamieh model |        |        |         |               |       |               |         |
|--------------------------------------|--------------|--------|--------|---------|---------------|-------|---------------|---------|
| T(K)                                 | CCl4         | CH2Cl2 | CHCl3  | Benzene | Diethyl ether | THF   | Ethyl acetate | Acetone |
| 313.15                               | 1.224        | 1.274  | 10.200 | 2.312   | 7.316         | 0.912 | 10.622        | 4.796   |
| 323.15                               | 1.216        | 1.254  | 10.674 | 2.011   | 7.165         | 0.906 | 10.246        | 4.575   |
| 333.15                               | 1.208        | 1.234  | 11.161 | 1.689   | 7.037         | 0.900 | 9.881         | 4.345   |
| 343.15                               | 1.200        | 1.214  | 11.670 | 1.346   | 6.913         | 0.894 | 9.489         | 4.104   |
| 353.15                               | 1.192        | 1.194  | 12.212 | 0.976   | 6.811         | 0.888 | 9.094         | 3.853   |
| 363.15                               | 1.184        | 1.174  | 12.820 | 0.561   | 6.776         | 0.882 | 8.746         | 3.590   |
| 373.15                               | 1.176        | 1.154  | 13.621 | 0.098   | 6.802         | 0.876 | 8.411         | 3.317   |

  

| $\Delta G_a^{sp} (T)$<br>(in kJ/mol) | Topological index |        |       |         |               |      |               |         |
|--------------------------------------|-------------------|--------|-------|---------|---------------|------|---------------|---------|
| T(K)                                 | CCl4              | CH2Cl2 | CHCl3 | Benzene | Diethyl ether | THF  | Ethyl acetate | Acetone |
| 313.15                               | 8.19              | 7.28   | 19.17 | 1.22    | 8.69          | 4.32 | 6.459         | 8.296   |
| 323.15                               | 8.16              | 6.98   | 18.46 | 1.00    | 8.35          | 4.26 | 6.379         | 8.103   |
| 333.15                               | 8.16              | 6.69   | 17.69 | 0.76    | 8.02          | 4.21 | 6.311         | 7.924   |
| 343.15                               | 8.15              | 6.37   | 16.80 | 0.53    | 7.69          | 4.15 | 6.241         | 7.744   |
| 353.15                               | 8.16              | 6.03   | 15.74 | 0.28    | 7.36          | 4.10 | 6.181         | 7.577   |
| 363.15                               | 8.25              | 5.73   | 14.37 | 0.00    | 7.08          | 4.09 | 6.159         | 7.458   |
| 373.15                               | 8.38              | 5.40   | 12.11 | -0.30   | 6.82          | 4.10 | 6.167         | 7.378   |

| $\Delta G_a^{sp}$ (T)<br>(in kJ/mol) | Deformation polarizability |        |       |         |               |      |               |         |
|--------------------------------------|----------------------------|--------|-------|---------|---------------|------|---------------|---------|
| T(K)                                 | CCl4                       | CH2Cl2 | CHCl3 | Benzene | Diethyl ether | THF  | Ethyl acetate | Acetone |
| 313.15                               | 9.56                       | -3.82  | 14.46 | 2.70    | 11.62         | 6.76 | 8.321         | 10.378  |
| 323.15                               | 9.50                       | -3.89  | 13.84 | 2.44    | 11.21         | 6.64 | 8.202         | 10.140  |
| 333.15                               | 9.48                       | -3.98  | 13.16 | 2.18    | 10.84         | 6.55 | 8.102         | 9.926   |
| 343.15                               | 9.44                       | -4.09  | 12.36 | 1.91    | 10.44         | 6.45 | 7.996         | 9.705   |
| 353.15                               | 9.42                       | -4.22  | 11.39 | 1.64    | 10.06         | 6.35 | 7.900         | 9.498   |
| 363.15                               | 9.50                       | -4.42  | 10.06 | 1.35    | 9.75          | 6.32 | 7.863         | 9.362   |
| 373.15                               | 9.63                       | -4.71  | 7.82  | 1.04    | 9.49          | 6.32 | 7.863         | 9.275   |

| $\Delta G_a^{sp}$ (T)<br>(in kJ/mol) | Vapor pressure |        |        |         |               |       |               |         |
|--------------------------------------|----------------|--------|--------|---------|---------------|-------|---------------|---------|
| T(K)                                 | CCl4           | CH2Cl2 | CHCl3  | Benzene | Diethyl ether | THF   | Ethyl acetate | Acetone |
| 313.15                               | 0.467          | -2.552 | 13.401 | 0.756   | 5.352         | 3.914 | 5.762         | 2.085   |
| 323.15                               | 0.588          | -2.639 | 12.886 | 0.600   | 5.039         | 3.868 | 5.782         | 2.079   |
| 333.15                               | 0.714          | -2.747 | 12.292 | 0.430   | 4.732         | 3.834 | 5.808         | 2.071   |
| 343.15                               | 0.844          | -2.865 | 11.582 | 0.257   | 4.424         | 3.791 | 5.831         | 2.076   |
| 353.15                               | 0.980          | -3.009 | 10.691 | 0.070   | 4.119         | 3.755 | 5.858         | 2.083   |
| 363.15                               | 1.125          | -3.221 | 9.440  | -0.153  | 3.830         | 3.754 | 5.917         | 2.083   |
| 373.15                               | 1.284          | -3.499 | 7.267  | -0.405  | 3.552         | 3.775 | 6.003         | 2.094   |

| $\Delta G_a^{sp}$ (T)<br>(in kJ/mol) | Boiling point |        |       |         |               |      |               |         |
|--------------------------------------|---------------|--------|-------|---------|---------------|------|---------------|---------|
| T(K)                                 | CCl4          | CH2Cl2 | CHCl3 | Benzene | Diethyl ether | THF  | Ethyl acetate | Acetone |
| 313.15                               | 0.45          | 0.11   | 10.53 | 1.26    | 5.50          | 3.95 | 3.905         | 2.447   |
| 323.15                               | 0.60          | -0.04  | 10.01 | 1.04    | 5.24          | 3.91 | 3.886         | 2.383   |
| 333.15                               | 0.72          | -0.22  | 9.38  | 0.79    | 4.95          | 3.84 | 3.844         | 2.291   |
| 343.15                               | 0.86          | -0.40  | 8.66  | 0.55    | 4.67          | 3.80 | 3.827         | 2.230   |
| 353.15                               | 1.03          | -0.58  | 7.78  | 0.33    | 4.43          | 3.77 | 3.836         | 2.192   |
| 363.15                               | 1.16          | -0.85  | 6.46  | 0.02    | 4.15          | 3.74 | 3.808         | 2.097   |
| 373.15                               | 1.35          | -1.12  | 4.25  | -0.26   | 3.93          | 3.77 | 3.848         | 2.060   |

| $\Delta G_a^{sp}$ (T)<br>(in kJ/mol) | $\Delta H_{vap}$ |        |        |         |               |       |               |         |
|--------------------------------------|------------------|--------|--------|---------|---------------|-------|---------------|---------|
| T(K)                                 | CCl4             | CH2Cl2 | CHCl3  | Benzene | Diethyl ether | THF   | Ethyl acetate | Acetone |
| 313.15                               | 0.681            | -2.687 | 10.827 | 0.120   | 4.658         | 3.686 | 2.588         | 1.062   |
| 323.15                               | 0.811            | -2.782 | 10.292 | -0.081  | 4.398         | 3.637 | 2.587         | 1.018   |
| 333.15                               | 0.948            | -2.896 | 9.676  | -0.295  | 4.144         | 3.601 | 2.590         | 0.970   |
| 343.15                               | 1.083            | -3.023 | 8.946  | -0.511  | 3.885         | 3.553 | 2.595         | 0.932   |
| 353.15                               | 1.226            | -3.173 | 8.038  | -0.737  | 3.630         | 3.514 | 2.606         | 0.898   |
| 363.15                               | 1.381            | -3.391 | 6.745  | -1.004  | 3.387         | 3.510 | 2.620         | 0.844   |
| 373.15                               | 1.550            | -3.677 | 4.514  | -1.304  | 3.151         | 3.525 | 2.643         | 0.792   |

| $\Delta G_a^{sp}$ (T)<br>(in kJ/mol) | $\Delta H_{vap}$ (T) |  |  |  |  |  |  |  |
|--------------------------------------|----------------------|--|--|--|--|--|--|--|
|--------------------------------------|----------------------|--|--|--|--|--|--|--|

| T(K)   | CCl4   | CH2Cl2 | CHCl3  | Benzene | Diethyl ether | THF   | Ethyl acetate | Acetone |
|--------|--------|--------|--------|---------|---------------|-------|---------------|---------|
| 313.15 | 0.549  | -2.456 | 10.544 | -0.042  | 4.386         | 4.787 | 4.404         | -0.502  |
| 323.15 | 0.408  | -2.667 | 9.600  | -0.690  | 3.778         | 4.664 | 4.315         | -0.255  |
| 333.15 | 0.269  | -2.923 | 8.579  | -1.357  | 3.177         | 4.532 | 4.210         | -0.062  |
| 343.15 | 0.148  | -3.194 | 7.476  | -2.003  | 2.599         | 4.383 | 4.099         | 0.114   |
| 353.15 | 0.044  | -3.500 | 6.214  | -2.643  | 2.041         | 4.230 | 3.983         | 0.254   |
| 363.15 | -0.052 | -3.890 | 4.566  | -3.334  | 1.492         | 4.105 | 3.869         | 0.326   |
| 373.15 | -0.128 | -4.356 | 1.994  | -4.050  | 0.962         | 3.996 | 3.765         | 0.369   |

**Table S7.** Values of ( $\Delta G_a^{sp}(T)$ ) (in kJ/mol) of the various polar solvents oxidized carbon fibers (b) as a function of the temperature by using the various models and IGC methods.

| $\Delta G_a^{sp}(T)$<br>(in kJ/mol) | Kiselev |       |        |         |               |       |               |         |
|-------------------------------------|---------|-------|--------|---------|---------------|-------|---------------|---------|
| T(K)                                | CCl4    | CHCl3 | CH2Cl2 | Benzene | Diethyl ether | THF   | Ethyl acetate | Acetone |
| 313.15                              | 1.883   | 7.019 | 9.793  | 8.720   | 9.121         | 2.387 | 7.994         | 12.608  |
| 323.15                              | 1.809   | 6.968 | 10.334 | 8.452   | 8.764         | 2.362 | 7.716         | 12.088  |
| 333.15                              | 1.735   | 6.941 | 10.949 | 8.205   | 8.407         | 2.337 | 7.446         | 11.582  |
| 343.15                              | 1.661   | 6.924 | 11.654 | 7.962   | 8.050         | 2.312 | 7.175         | 11.073  |
| 353.15                              | 1.587   | 6.922 | 12.505 | 7.725   | 7.693         | 2.287 | 6.903         | 10.562  |
| 363.15                              | 1.513   | 6.941 | 13.630 | 7.496   | 7.336         | 2.262 | 6.631         | 10.049  |
| 373.15                              | 1.439   | 6.989 | 15.494 | 7.280   | 6.979         | 2.237 | 6.358         | 9.533   |

| $\Delta G_a^{sp}(T)$<br>(in kJ/mol) | Spherical |       |        |         |               |       |               |         |
|-------------------------------------|-----------|-------|--------|---------|---------------|-------|---------------|---------|
| T(K)                                | CCl4      | CHCl3 | CH2Cl2 | Benzene | Diethyl ether | THF   | Ethyl acetate | Acetone |
| 313.15                              | 2.641     | 9.635 | 13.367 | 8.298   | 12.441        | 7.136 | 10.477        | 14.576  |
| 323.15                              | 2.483     | 9.450 | 13.771 | 8.097   | 11.875        | 6.835 | 10.011        | 13.879  |
| 333.15                              | 2.329     | 9.294 | 14.251 | 7.920   | 11.317        | 6.544 | 9.562         | 13.203  |
| 343.15                              | 2.177     | 9.147 | 14.819 | 7.748   | 10.758        | 6.253 | 9.115         | 12.528  |
| 353.15                              | 2.028     | 9.015 | 15.533 | 7.585   | 10.201        | 5.964 | 8.671         | 11.855  |
| 363.15                              | 1.881     | 8.904 | 16.525 | 7.434   | 9.645         | 5.676 | 8.231         | 11.184  |
| 373.15                              | 1.737     | 8.823 | 18.289 | 7.299   | 9.090         | 5.389 | 7.794         | 10.515  |

| $\Delta G_a^{sp}(T)$<br>(in kJ/mol) | Geometric |        |        |         |               |       |               |         |
|-------------------------------------|-----------|--------|--------|---------|---------------|-------|---------------|---------|
| T(K)                                | CCl4      | CHCl3  | CH2Cl2 | Benzene | Diethyl ether | THF   | Ethyl acetate | Acetone |
| 313.15                              | 6.894     | 10.221 | 14.562 | 5.706   | 9.894         | 5.477 | 9.687         | 10.647  |
| 323.15                              | 6.648     | 9.868  | 14.366 | 5.587   | 9.508         | 5.326 | 9.401         | 10.278  |
| 333.15                              | 6.407     | 9.535  | 14.210 | 5.485   | 9.124         | 5.177 | 9.124         | 9.920   |
| 343.15                              | 6.164     | 9.205  | 14.088 | 5.388   | 8.739         | 5.027 | 8.844         | 9.558   |
| 353.15                              | 5.919     | 8.877  | 14.020 | 5.298   | 8.355         | 4.877 | 8.561         | 9.194   |
| 363.15                              | 5.670     | 8.555  | 14.053 | 5.216   | 7.969         | 4.725 | 8.275         | 8.826   |
| 373.15                              | 5.417     | 8.240  | 14.359 | 5.147   | 7.583         | 4.571 | 7.984         | 8.454   |



| $\Delta G_a^{sp}$ (T)<br>(in kJ/mol) | VDW   |        |        |         |               |       |               |         |
|--------------------------------------|-------|--------|--------|---------|---------------|-------|---------------|---------|
| T(K)                                 | CCl4  | CHCl3  | CH2Cl2 | Benzene | Diethyl ether | THF   | Ethyl acetate | Acetone |
| 2.457                                | 8.382 | 13.018 | 7.461  | 12.436  | 7.669         | 9.367 | 13.163        | 5.958   |
| 2.343                                | 8.232 | 13.254 | 7.279  | 11.890  | 7.370         | 9.010 | 12.595        | 5.577   |
| 2.231                                | 8.107 | 13.557 | 7.117  | 11.349  | 7.076         | 8.665 | 12.043        | 5.196   |
| 2.121                                | 7.992 | 13.935 | 6.962  | 10.809  | 6.785         | 8.320 | 11.491        | 4.813   |
| 2.011                                | 7.891 | 14.433 | 6.815  | 10.269  | 6.492         | 7.976 | 10.938        | 4.431   |
| 1.900                                | 7.808 | 15.158 | 6.677  | 9.727   | 6.198         | 7.630 | 10.383        | 4.050   |
| 1.792                                | 7.754 | 16.503 | 6.556  | 9.187   | 5.905         | 7.287 | 9.828         | 3.667   |

| $\Delta G_a^{sp}$ (T)<br>(in kJ/mol) | R-K   |       |        |         |               |       |               |         |
|--------------------------------------|-------|-------|--------|---------|---------------|-------|---------------|---------|
| T(K)                                 | CCl4  | CHCl3 | CH2Cl2 | Benzene | Diethyl ether | THF   | Ethyl acetate | Acetone |
| 313.15                               | 2.502 | 8.451 | 13.072 | 7.509   | 12.485        | 7.677 | 9.397         | 13.195  |
| 323.15                               | 2.386 | 8.297 | 13.305 | 7.324   | 11.936        | 7.377 | 9.039         | 12.625  |
| 333.15                               | 2.271 | 8.168 | 13.606 | 7.160   | 11.393        | 7.083 | 8.692         | 12.071  |
| 343.15                               | 2.158 | 8.049 | 13.980 | 7.002   | 10.849        | 6.790 | 8.344         | 11.516  |
| 353.15                               | 2.045 | 7.943 | 14.475 | 6.851   | 10.306        | 6.496 | 7.997         | 10.960  |
| 363.15                               | 1.933 | 7.857 | 15.198 | 6.712   | 9.763         | 6.203 | 7.651         | 10.405  |
| 373.15                               | 1.821 | 7.796 | 16.539 | 6.586   | 9.218         | 5.908 | 7.304         | 9.846   |

| $\Delta G_a^{sp}$ (T)<br>(in kJ/mol) | Cylindrical |        |        |         |               |       |               |         |
|--------------------------------------|-------------|--------|--------|---------|---------------|-------|---------------|---------|
| T(K)                                 | CCl4        | CHCl3  | CH2Cl2 | Benzene | Diethyl ether | THF   | Ethyl acetate | Acetone |
| 313.15                               | 2.368       | 11.481 | 15.358 | 5.739   | 7.731         | 0.560 | 8.234         | 9.774   |
| 323.15                               | 2.289       | 11.074 | 15.223 | 5.652   | 7.449         | 0.626 | 7.969         | 9.412   |
| 333.15                               | 2.209       | 10.690 | 15.138 | 5.584   | 7.164         | 0.689 | 7.712         | 9.061   |
| 343.15                               | 2.129       | 10.311 | 15.100 | 5.522   | 6.881         | 0.753 | 7.454         | 8.707   |
| 353.15                               | 2.049       | 9.937  | 15.137 | 5.468   | 6.598         | 0.818 | 7.193         | 8.351   |
| 363.15                               | 1.967       | 9.572  | 15.317 | 5.425   | 6.315         | 0.883 | 6.932         | 7.993   |
| 373.15                               | 1.884       | 9.219  | 15.879 | 5.397   | 6.032         | 0.948 | 6.668         | 7.631   |

| $\Delta G_a^{sp}$ (T)<br>(in kJ/mol) | Hamieh model |        |       |         |               |       |               |         |
|--------------------------------------|--------------|--------|-------|---------|---------------|-------|---------------|---------|
| T(K)                                 | CCl4         | CH2Cl2 | CHCl3 | Benzene | Diethyl ether | THF   | Ethyl acetate | Acetone |
| 313.15                               | 2.214        | 1.371  | 2.429 | 7.584   | 12.485        | 0.739 | 14.315        | 12.002  |
| 323.15                               | 2.132        | 1.321  | 2.142 | 7.305   | 12.213        | 0.669 | 13.825        | 11.615  |
| 333.15                               | 2.050        | 1.271  | 1.855 | 7.029   | 11.952        | 0.599 | 13.343        | 11.230  |
| 343.15                               | 1.968        | 1.221  | 1.568 | 6.737   | 11.700        | 0.529 | 12.849        | 10.831  |
| 353.15                               | 1.886        | 1.171  | 1.281 | 6.430   | 11.460        | 0.459 | 12.344        | 10.418  |
| 363.15                               | 1.804        | 1.121  | 0.994 | 6.106   | 11.232        | 0.389 | 11.827        | 9.990   |
| 373.15                               | 1.722        | 1.071  | 0.707 | 5.767   | 11.024        | 0.319 | 11.299        | 9.547   |

| $\Delta G_a^{sp}$ (T)<br>(in kJ/mol) | Topological index |  |  |  |  |  |  |  |
|--------------------------------------|-------------------|--|--|--|--|--|--|--|
|--------------------------------------|-------------------|--|--|--|--|--|--|--|

| T(K)   | CCl4  | CH2Cl2 | CHCl3  | Benzene | Diethyl ether | THF   | Ethyl acetate | Acetone |
|--------|-------|--------|--------|---------|---------------|-------|---------------|---------|
| 313.15 | 9.215 | 13.701 | 17.095 | 6.498   | 13.855        | 6.178 | 10.168        | 15.487  |
| 323.15 | 9.054 | 13.309 | 16.685 | 6.307   | 13.383        | 6.065 | 10.012        | 15.095  |
| 333.15 | 8.903 | 12.940 | 16.295 | 6.131   | 12.917        | 5.955 | 9.867         | 14.723  |
| 343.15 | 8.755 | 12.570 | 15.905 | 5.954   | 12.452        | 5.846 | 9.722         | 14.350  |
| 353.15 | 8.607 | 12.201 | 15.515 | 5.778   | 11.988        | 5.739 | 9.578         | 13.978  |
| 363.15 | 8.460 | 11.832 | 15.126 | 5.601   | 11.525        | 5.631 | 9.433         | 13.605  |
| 373.15 | 8.315 | 11.463 | 14.736 | 5.425   | 11.062        | 5.524 | 9.289         | 13.233  |

| $\Delta G_a^{sp}$ (T)<br>(in kJ/mol) | Deformation polarizability |        |        |         |               |       |               |         |
|--------------------------------------|----------------------------|--------|--------|---------|---------------|-------|---------------|---------|
| T(K)                                 | CCl4                       | CH2Cl2 | CHCl3  | Benzene | Diethyl ether | THF   | Ethyl acetate | Acetone |
| 313.15                               | 10.578                     | 2.646  | 12.402 | 7.965   | 16.769        | 8.604 | 12.023        | 17.560  |
| 323.15                               | 10.375                     | 2.585  | 12.131 | 7.729   | 16.208        | 8.416 | 11.810        | 17.106  |
| 333.15                               | 10.185                     | 2.533  | 11.876 | 7.510   | 15.658        | 8.236 | 11.612        | 16.673  |
| 343.15                               | 9.998                      | 2.482  | 11.622 | 7.292   | 15.110        | 8.059 | 11.415        | 16.242  |
| 353.15                               | 9.811                      | 2.430  | 11.367 | 7.073   | 14.563        | 7.881 | 11.216        | 15.809  |
| 363.15                               | 9.625                      | 2.379  | 11.112 | 6.854   | 14.015        | 7.703 | 11.018        | 15.377  |
| 373.15                               | 9.441                      | 2.328  | 10.857 | 6.636   | 13.469        | 7.527 | 10.821        | 14.945  |

| $\Delta G_a^{sp}$ (T)<br>(in kJ/mol) | Vapor pressure |        |        |         |               |       |               |         |
|--------------------------------------|----------------|--------|--------|---------|---------------|-------|---------------|---------|
| T(K)                                 | CCl4           | CH2Cl2 | CHCl3  | Benzene | Diethyl ether | THF   | Ethyl acetate | Acetone |
| 313.15                               | 1.526          | 3.906  | 11.352 | 6.034   | 10.528        | 5.772 | 9.475         | 9.302   |
| 323.15                               | 1.582          | 3.817  | 11.184 | 5.914   | 10.116        | 5.677 | 9.422         | 9.153   |
| 333.15                               | 1.639          | 3.738  | 11.026 | 5.803   | 9.707         | 5.586 | 9.375         | 9.015   |
| 343.15                               | 1.699          | 3.658  | 10.863 | 5.689   | 9.301         | 5.495 | 9.322         | 8.876   |
| 353.15                               | 1.762          | 3.577  | 10.696 | 5.570   | 8.898         | 5.404 | 9.264         | 8.735   |
| 363.15                               | 1.827          | 3.496  | 10.526 | 5.448   | 8.497         | 5.314 | 9.202         | 8.594   |
| 373.15                               | 1.892          | 3.412  | 10.349 | 5.319   | 8.098         | 5.221 | 9.132         | 8.449   |

| $\Delta G_a^{sp}$ (T)<br>(in kJ/mol) | Boiling point |        |       |         |               |      |               |         |
|--------------------------------------|---------------|--------|-------|---------|---------------|------|---------------|---------|
| T(K)                                 | CCl4          | CH2Cl2 | CHCl3 | Benzene | Diethyl ether | THF  | Ethyl acetate | Acetone |
| 313.15                               | 1.50          | 6.55   | 8.49  | 6.53    | 10.67         | 5.80 | 7.61629       | 9.65479 |
| 323.15                               | 1.57          | 6.36   | 8.32  | 6.32    | 10.28         | 5.69 | 7.52697       | 9.42758 |
| 333.15                               | 1.65          | 6.20   | 8.19  | 6.15    | 9.92          | 5.60 | 7.46463       | 9.22944 |
| 343.15                               | 1.73          | 6.04   | 8.06  | 5.98    | 9.55          | 5.51 | 7.40329       | 9.03229 |
| 353.15                               | 1.78          | 5.85   | 7.89  | 5.77    | 9.15          | 5.39 | 7.30593       | 8.80121 |
| 363.15                               | 1.86          | 5.70   | 7.76  | 5.60    | 8.79          | 5.30 | 7.24459       | 8.60407 |
| 373.15                               | 1.95          | 5.54   | 7.62  | 5.43    | 8.43          | 5.22 | 7.18225       | 8.40592 |

| $\Delta G_a^{sp}$ (T)<br>(in kJ/mol) | $\Delta H_{vap}$ |        |       |         |               |       |               |         |
|--------------------------------------|------------------|--------|-------|---------|---------------|-------|---------------|---------|
| T(K)                                 | CCl4             | CH2Cl2 | CHCl3 | Benzene | Diethyl ether | THF   | Ethyl acetate | Acetone |
| 313.15                               | 1.73934          | 3.771  | 8.789 | 5.401   | 9.837         | 5.546 | 6.313         | 8.283   |

|        |         |       |       |       |       |       |       |       |
|--------|---------|-------|-------|-------|-------|-------|-------|-------|
| 323.15 | 1.80209 | 3.676 | 8.627 | 5.242 | 9.484 | 5.449 | 6.272 | 8.107 |
| 333.15 | 1.86555 | 3.591 | 8.475 | 5.096 | 9.133 | 5.357 | 6.237 | 7.941 |
| 343.15 | 1.93425 | 3.510 | 8.326 | 4.953 | 8.786 | 5.270 | 6.206 | 7.778 |
| 353.15 | 1.99982 | 3.424 | 8.174 | 4.807 | 8.436 | 5.179 | 6.171 | 7.610 |
| 363.15 | 2.06732 | 3.340 | 8.022 | 4.661 | 8.088 | 5.088 | 6.136 | 7.444 |
| 373.15 | 2.14    | 3.255 | 7.870 | 4.515 | 7.740 | 4.998 | 6.102 | 7.278 |

| $\Delta G_a^{sp}(T)$<br>(in kJ/mol) | $\Delta H_{vap}(T)$ |        |       |         |               |      |               |         |
|-------------------------------------|---------------------|--------|-------|---------|---------------|------|---------------|---------|
| T(K)                                | CCl4                | CH2Cl2 | CHCl3 | Benzene | Diethyl ether | THF  | Ethyl acetate | Acetone |
| 313.15                              | 1.60                | 4.00   | 8.50  | 5.23    | 9.56          | 6.64 | 8.118         | 6.722   |
| 323.15                              | 1.40                | 3.79   | 7.94  | 4.64    | 8.87          | 6.46 | 7.976         | 6.852   |
| 333.15                              | 1.20                | 3.56   | 7.40  | 4.05    | 8.19          | 6.26 | 7.809         | 6.929   |
| 343.15                              | 1.00                | 3.30   | 6.88  | 3.47    | 7.52          | 6.03 | 7.621         | 6.955   |
| 353.15                              | 0.83                | 3.04   | 6.39  | 2.91    | 6.88          | 5.80 | 7.418         | 6.931   |
| 363.15                              | 0.67                | 2.76   | 5.93  | 2.38    | 6.27          | 5.55 | 7.206         | 6.861   |
| 373.15                              | 0.55                | 2.50   | 5.52  | 1.89    | 5.70          | 5.30 | 6.994         | 6.755   |

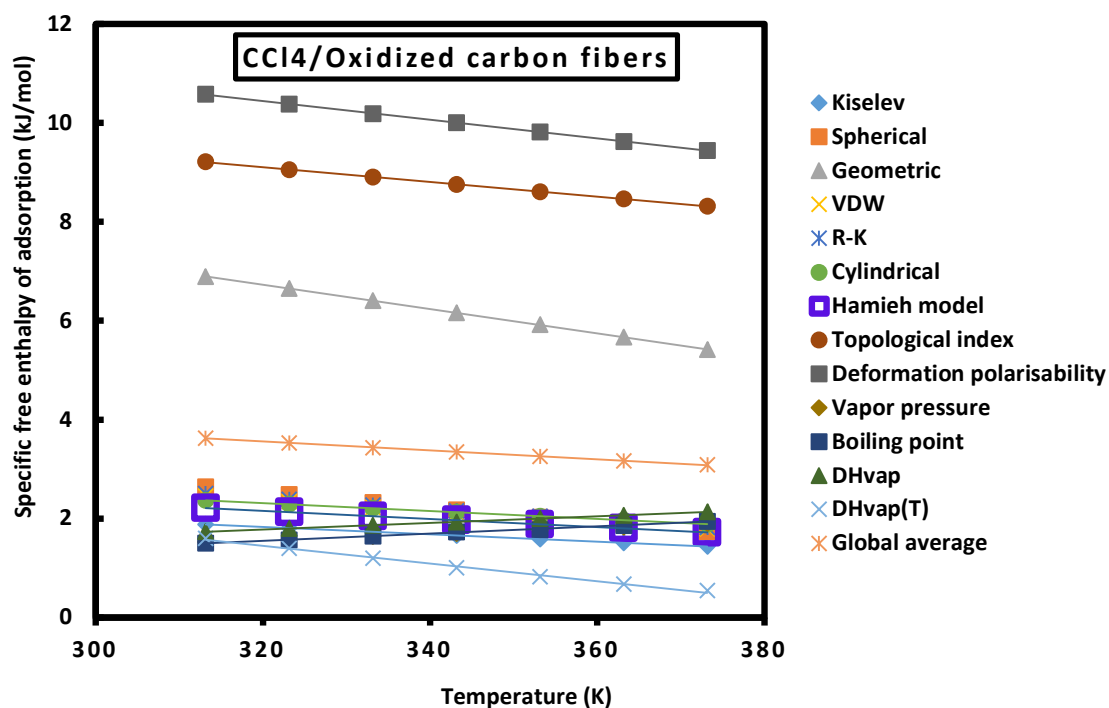

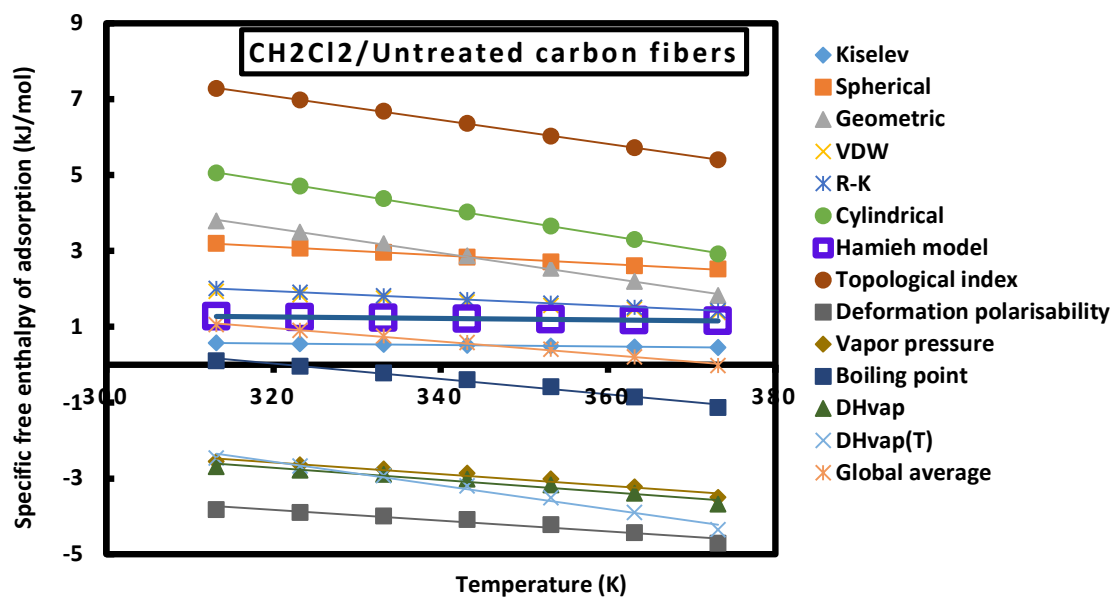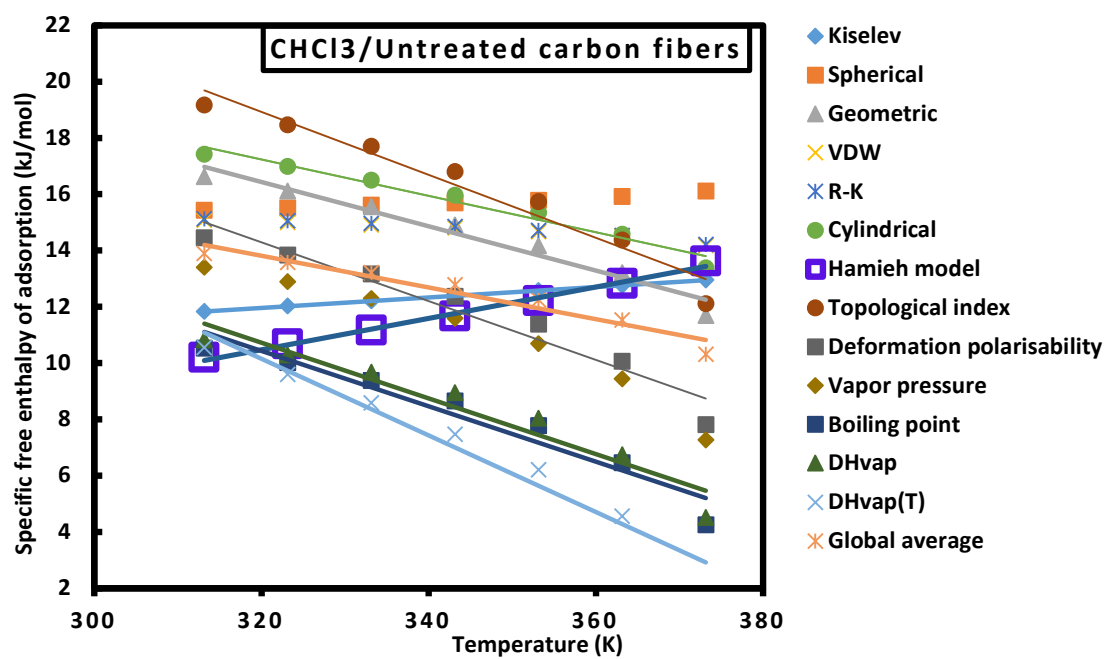

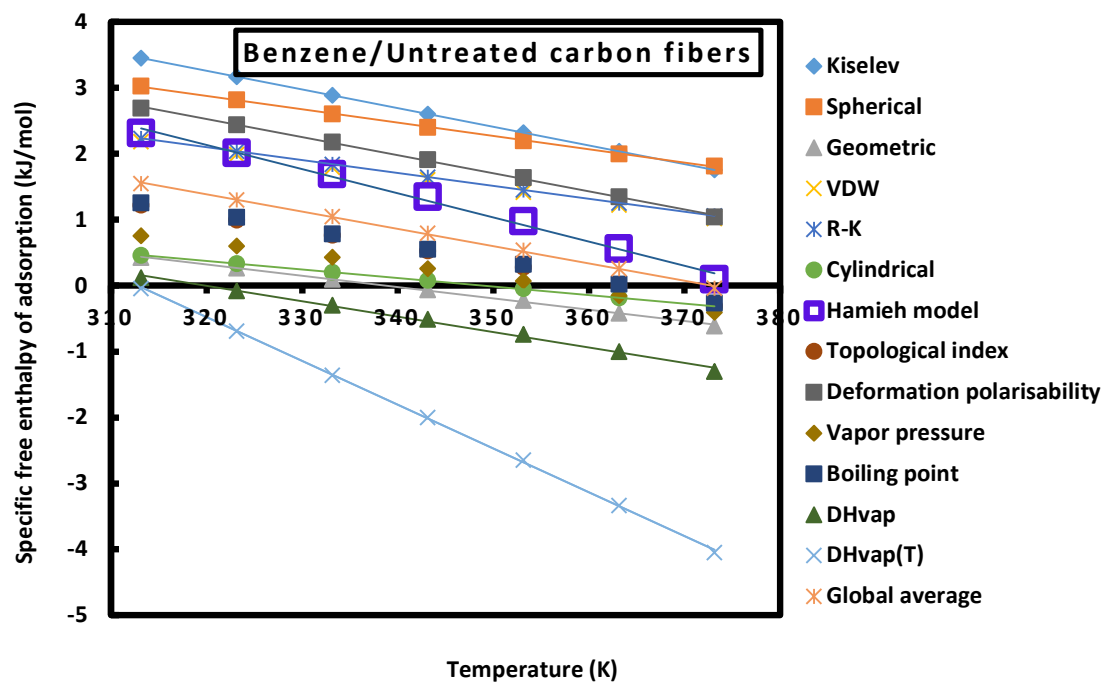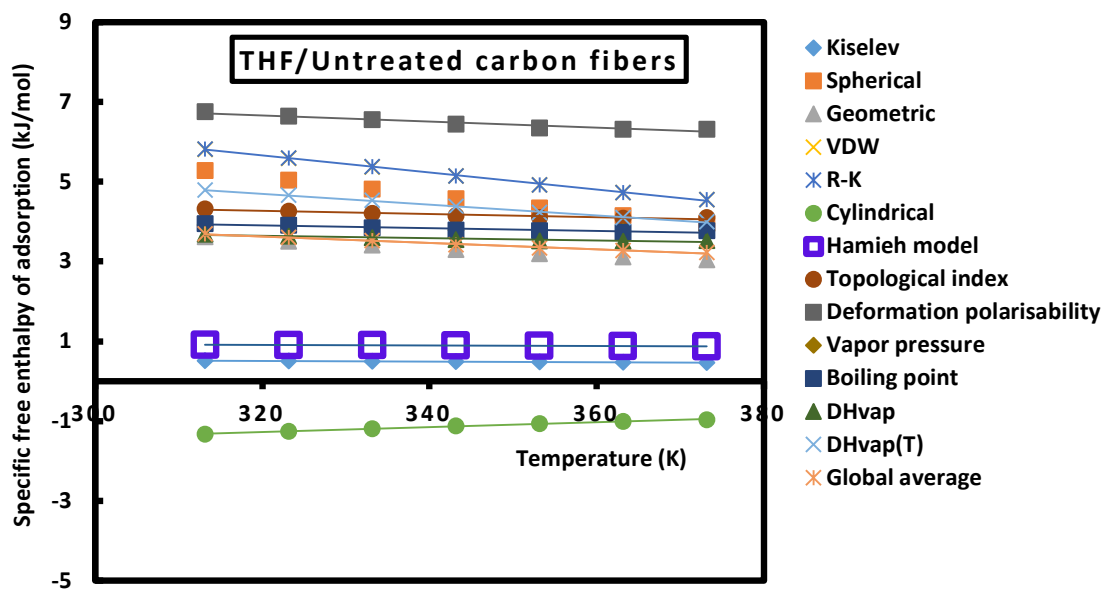

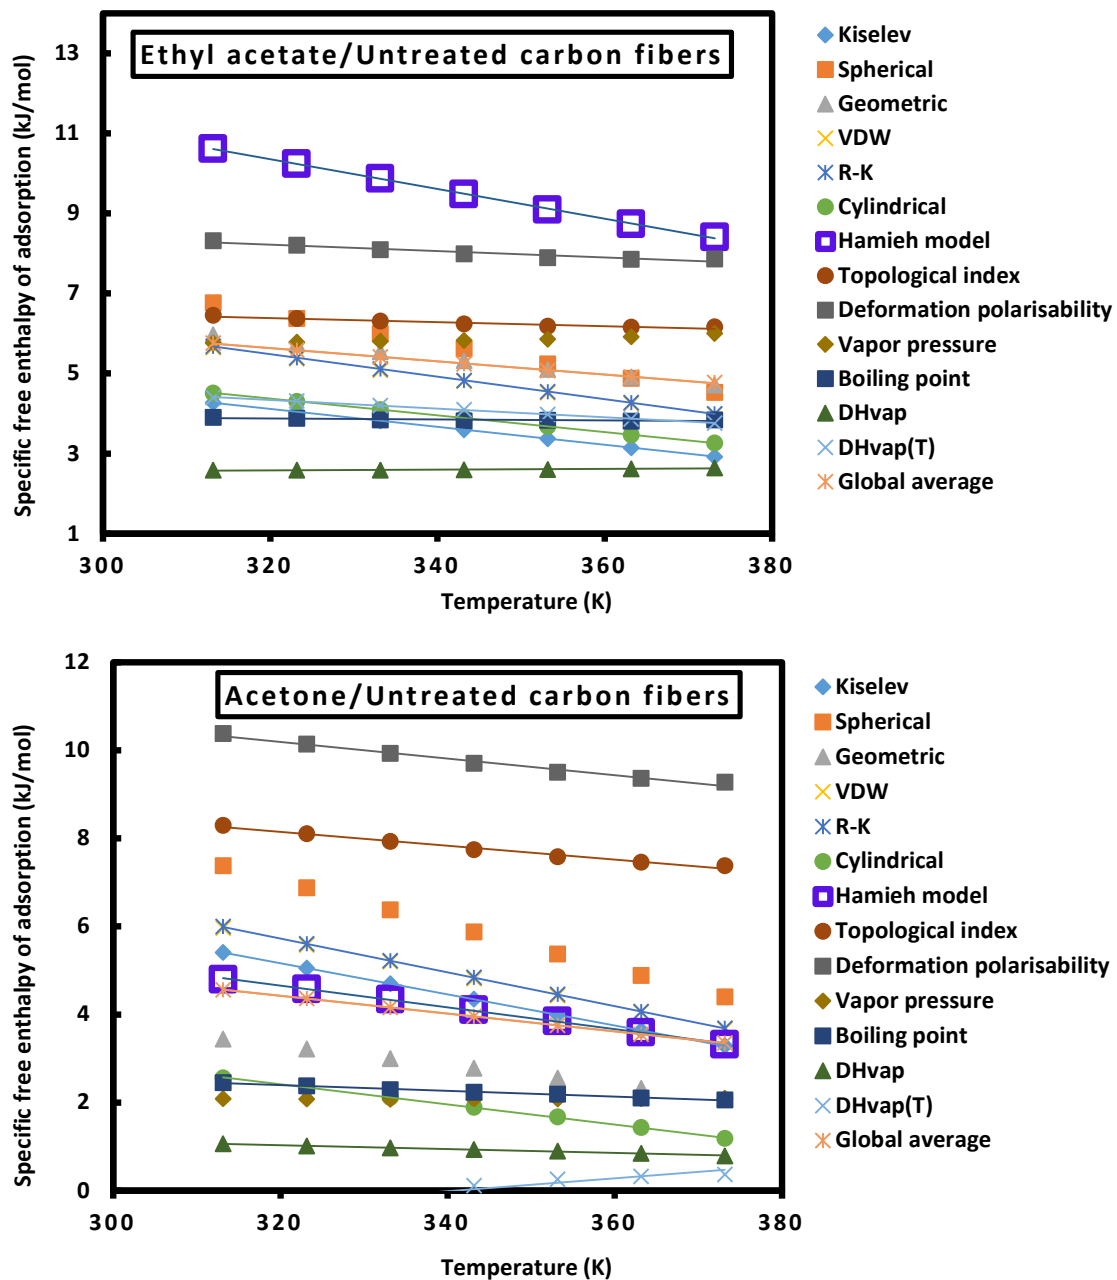

**Figures S3.** Variations of  $\Delta G_a^{sp}$  of the various solvents adsorbed on untreated carbon fibers as a function of the temperature for the different models and chromatographic methods.

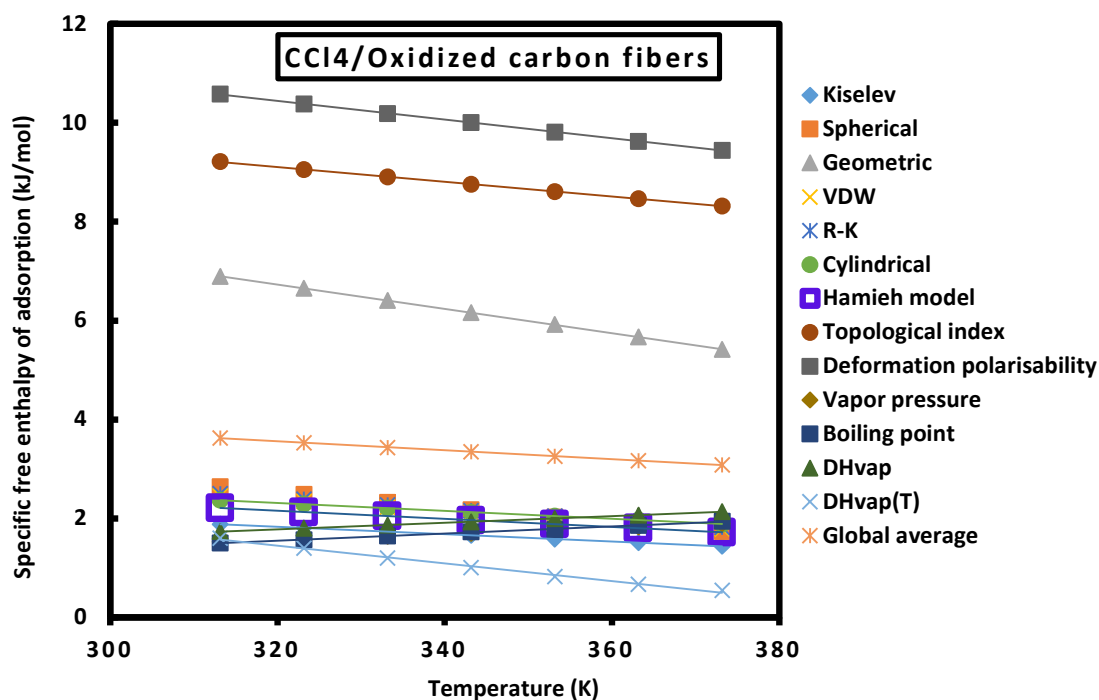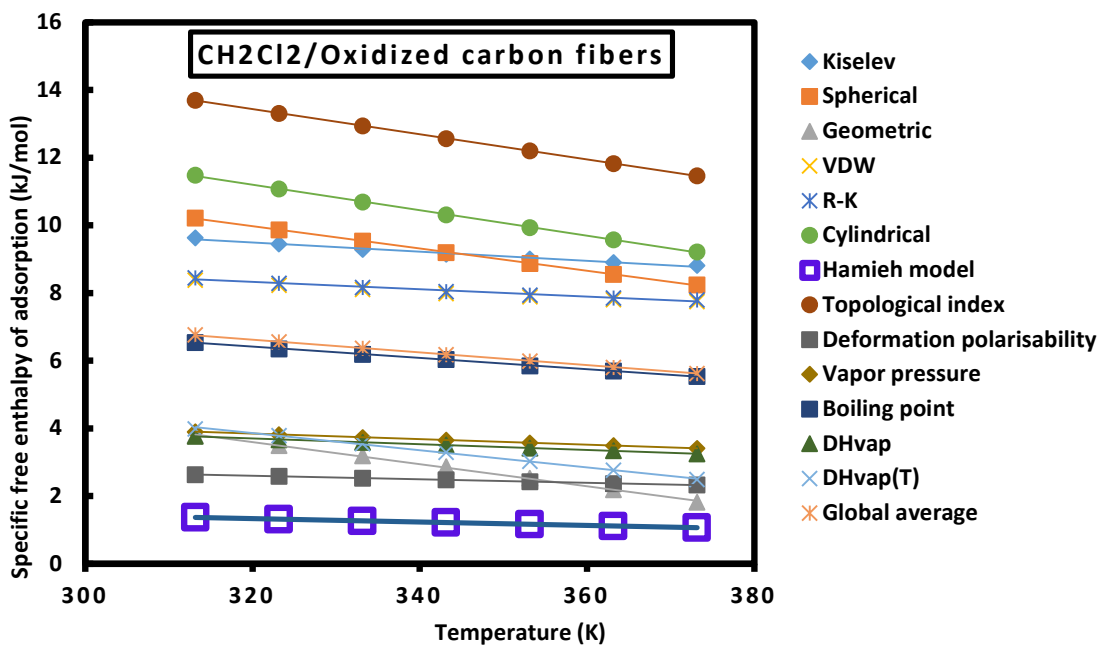

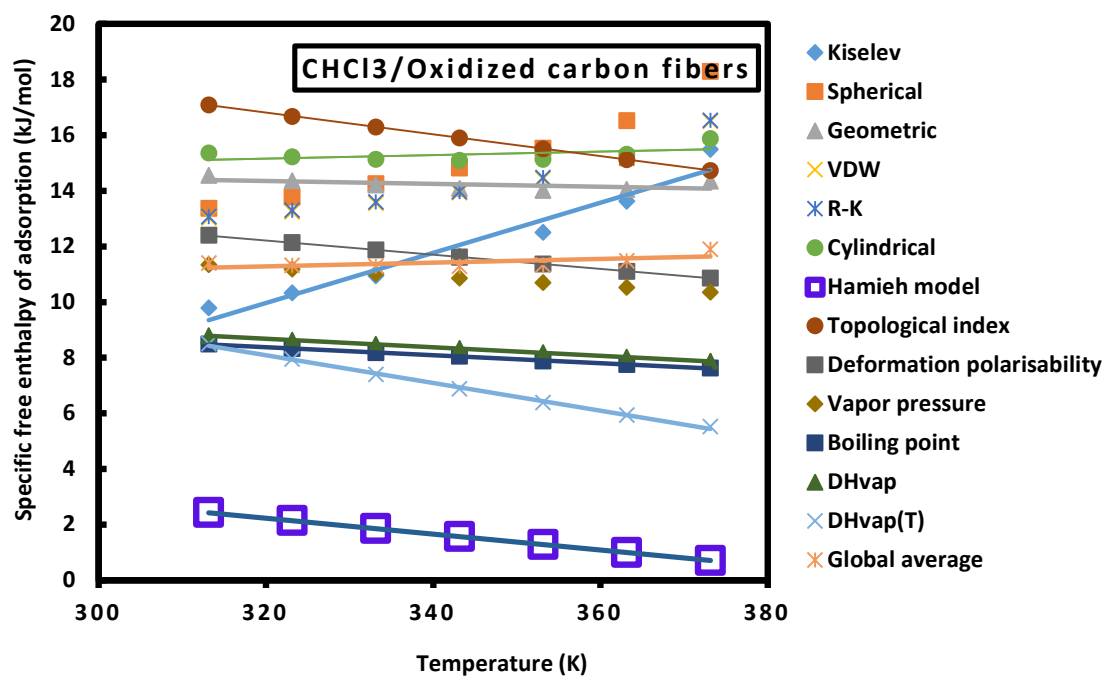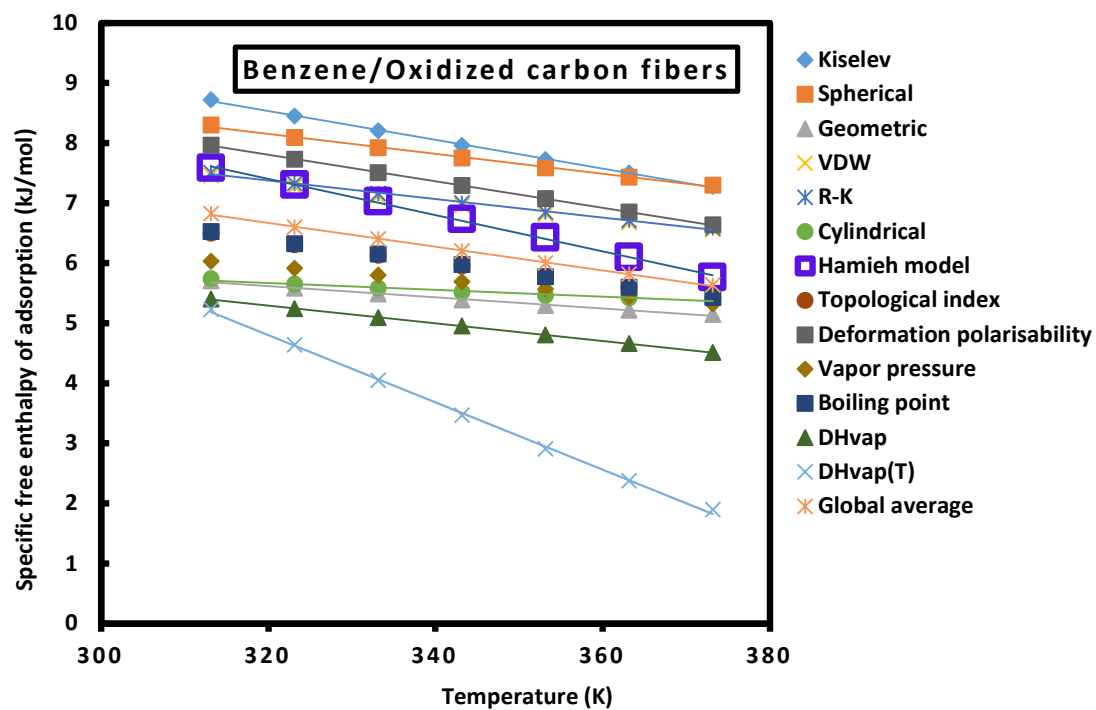



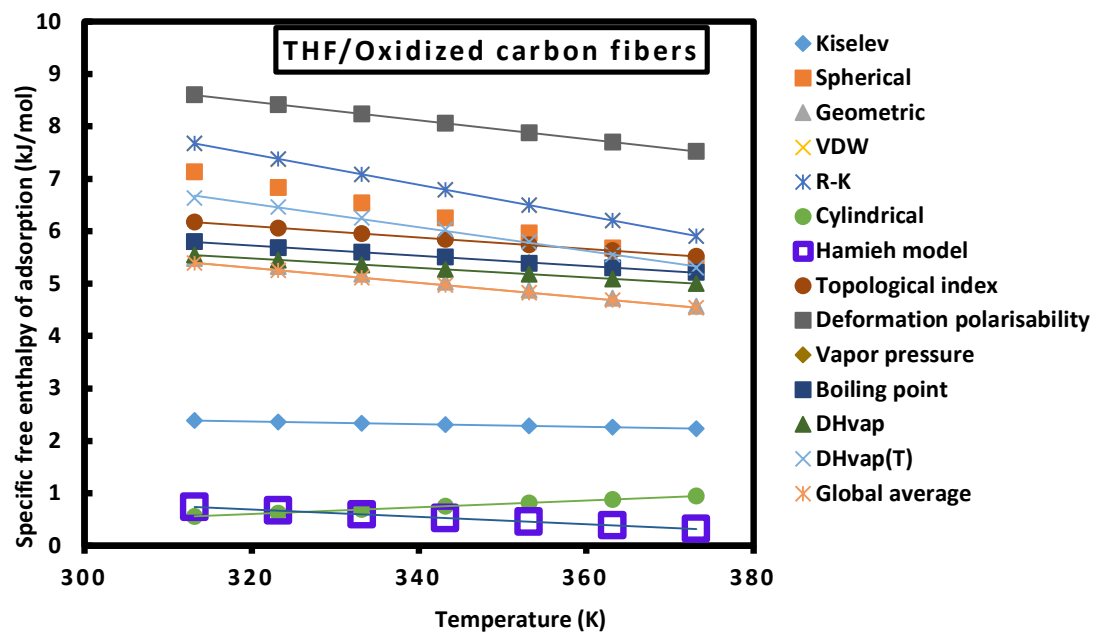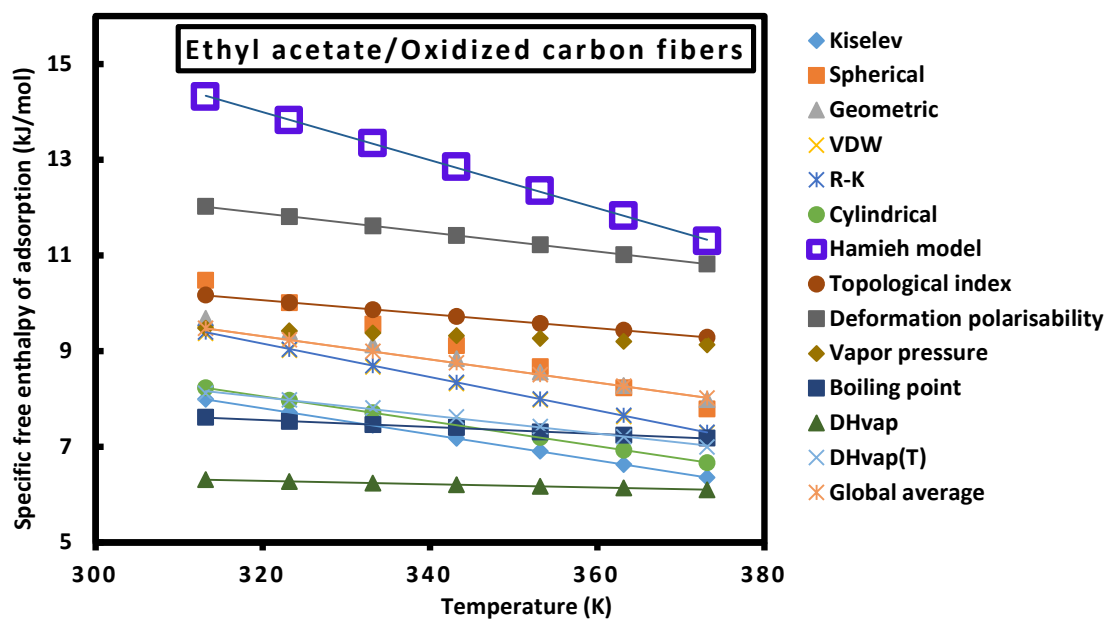

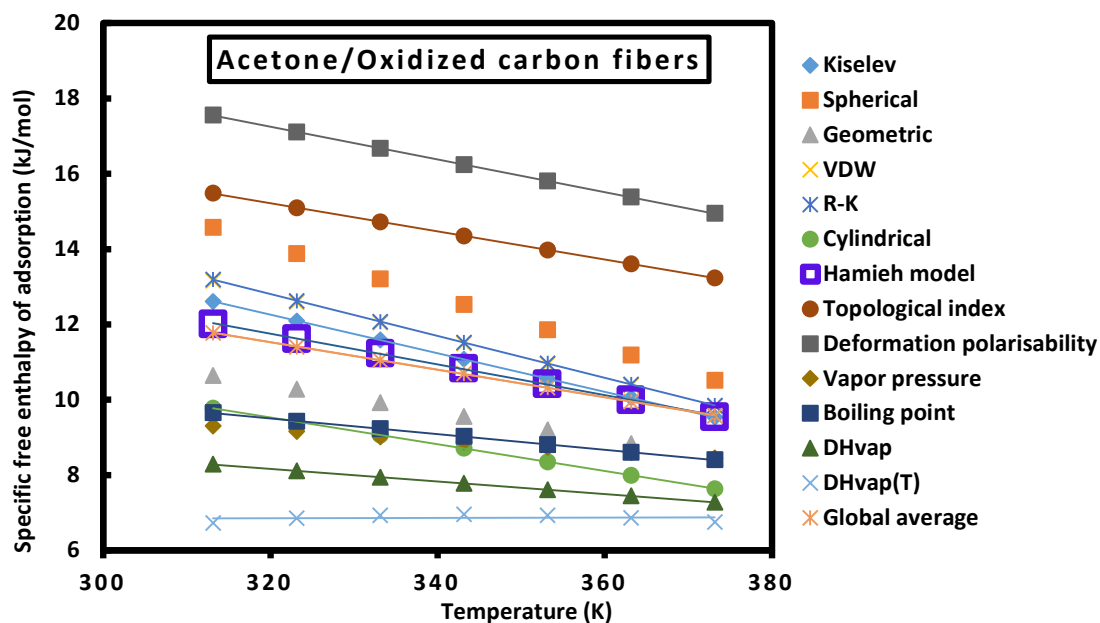

**Figures S4.** Variations of  $\Delta G_a^{sp}$  of the various solvents adsorbed on oxidized carbon fibers as a function of the temperature for the different models and chromatographic methods.

**Table S8.** Variations of  $(-\Delta S_a^{sp} \text{ in } J K^{-1} mol^{-1})$  as a function of the used models or methods of polar molecules adsorbed on carbon fibers (a) and (b).

| Untreated carbon fibers (a) |       |        |       |         |       |      |      |         |
|-----------------------------|-------|--------|-------|---------|-------|------|------|---------|
| Probes                      | CCl4  | CH2Cl2 | CHCl3 | Benzene | Ether | THF  | EA   | Acetone |
| Kiselev                     | 0.8   | 2.0    | 18.5  | 0.8     | 28.3  | 27.2 | 22.5 | 35.3    |
| Spherical                   | 7.8   | 11.4   | -10.9 | 22.1    | 20.3  | 43.6 | 37.4 | 49.7    |
| Geometric                   | 11.7  | 32.6   | 78.6  | 9.7     | 17.2  | 29.1 | 21.1 | 22.4    |
| VDW                         | 3.8   | 10.3   | 15.5  | 23.2    | 21.1  | 45.1 | 30.5 | 41.7    |
| R-K                         | 3.7   | 9.8    | 14.3  | 21.4    | 19.6  | 41.6 | 28.1 | 38.4    |
| Cylindrical                 | 0.8   | 38.8   | 71.0  | -6.6    | 14.2  | 23.3 | 22.7 | 24.9    |
| Hamieh model                | 0.8   | 2.0    | 18.5  | 0.6     | 20.0  | 14.1 | 37.2 | 24.6    |
| Topological index           | -2.7  | 31.5   | 111.8 | 3.9     | 25.2  | 31.5 | 5.2  | 15.7    |
| Deformation polarizability  | 0.0   | 14.2   | 104.5 | 7.7     | 27.4  | 36.0 | 8.0  | 17.8    |
| Vapor pressure              | 13.5  | 15.2   | 96.1  | 2.6     | 19.1  | 30.1 | -3.7 | 0.0     |
| Boiling point               | -14.7 | 0.0    | 98.4  | 3.4     | 25.1  | 26.5 | 1.2  | 6.5     |
| $\Delta H_{vap}$            | -14.4 | 15.9   | 98.8  | 2.9     | 23.4  | 25.2 | -0.9 | 4.4     |
| $\Delta H_{vap}(T)$         | 11.3  | 31.2   | 13.6  | 13.5    | 66.4  | 57.1 | 10.8 | -14.6   |
| Average values              | 1.7   | 16.5   | 56.1  | 8.1     | 25.2  | 33.1 | 16.9 | 20.5    |
| Oxidized carbon fibers (b)  |       |        |       |         |       |      |      |         |
| Probes                      | CCl4  | CH2Cl2 | CHCl3 | Benzene | Ether | THF  | EA   | Acetone |

|                            |      |      |       |      |      |      |      |      |
|----------------------------|------|------|-------|------|------|------|------|------|
| Kiselev                    | 7.4  | 0    | 90.2  | 2.5  | 24   | 35.7 | 27.2 | 51.1 |
| Spherical                  | 15.1 | 13.6 | -7.7  | 29.1 | 16.6 | 55.8 | 44.6 | 67.6 |
| Geometric                  | 24.6 | 33   | 5.1   | 15.1 | 9.3  | 38.5 | 28.3 | 36.5 |
| VDW                        | 12.1 | 11.4 | -59.8 | 32   | 16.4 | 59.1 | 37.8 | 60.6 |
| R-K                        | 11.3 | 11   | -53.8 | 29.4 | 15.4 | 54.4 | 34.8 | 55.7 |
| Cylindrical                | 8.8  | 41.1 | -7.3  | -7.1 | 6.2  | 30.9 | 28.4 | 38.9 |
| Hamieh model               | 8.2  | 5    | 28.7  | 7    | 30.2 | 24.4 | 50.2 | 40.8 |
| Topological index          | 14.9 | 37.2 | 39.2  | 10.9 | 17.8 | 46.5 | 14.6 | 37.5 |
| Deformation polarizability | 18.9 | 5.2  | 25.6  | 17.9 | 22.1 | 54.9 | 19.9 | 43.5 |
| Vapor pressure             | -6.1 | 8.2  | 16.6  | 9.1  | 11.8 | 40.5 | 5.6  | 14.1 |
| Boiling point              | -7.3 | 16.8 | 14.4  | 9.8  | 18.2 | 37.4 | 7.2  | 20.8 |
| $\Delta H_{vap}$           | -6.6 | 8.5  | 15.2  | 9.1  | 14.7 | 34.9 | 3.5  | 16.7 |
| $\Delta H_{vap}(T)$        | 17.9 | 25.2 | 49.9  | 22.5 | 56   | 64.6 | 18.9 | 0.0  |
| Average values             | 9.2  | 16.6 | 12.0  | 14.4 | 19.9 | 44.4 | 24.7 | 37.2 |

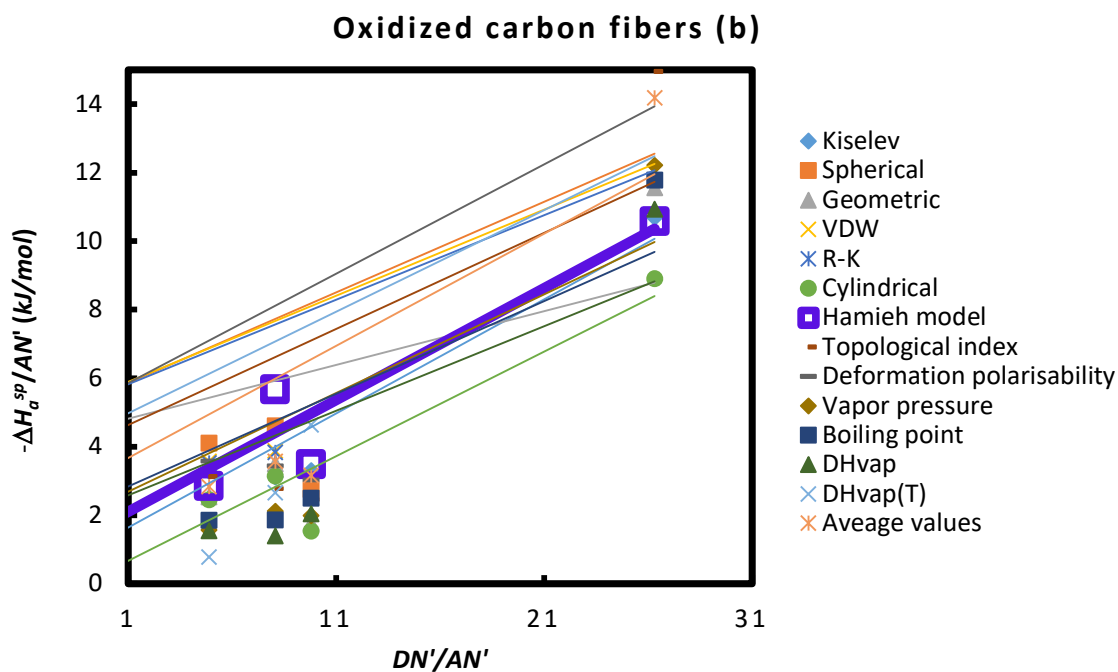

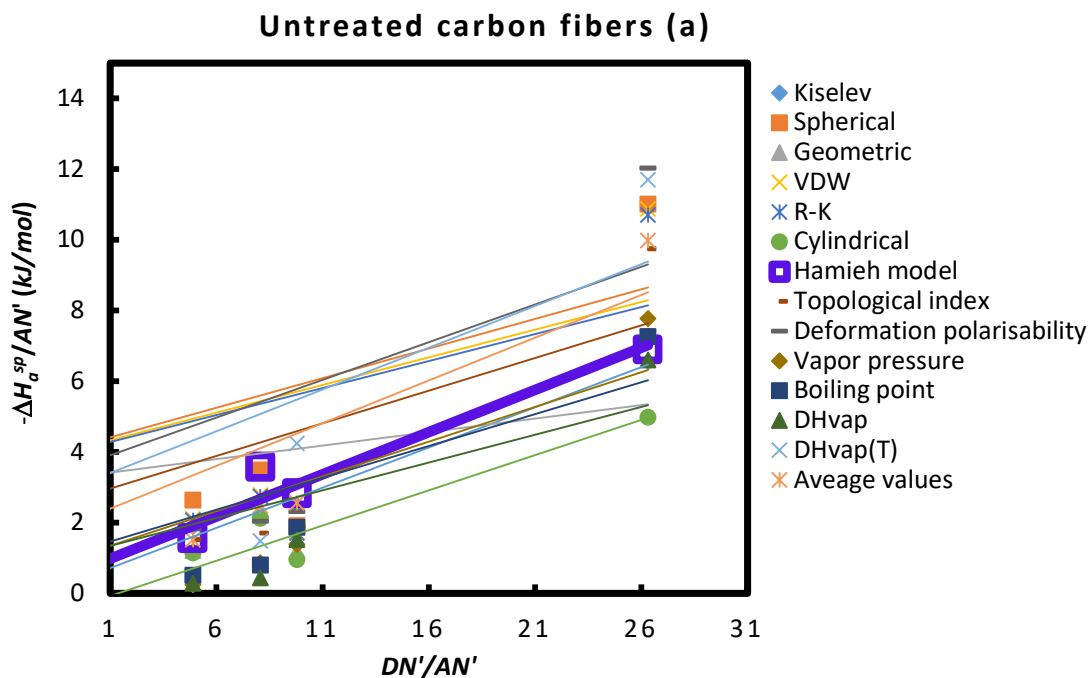

**Figure S5.** Variations of  $\left(\frac{-\Delta H_a^{sp}}{AN'}\right)$  as a function of  $\left(\frac{DN'}{AN'}\right)$  for different molecular models and IGC methods for the carbon fibers (a) and (b).

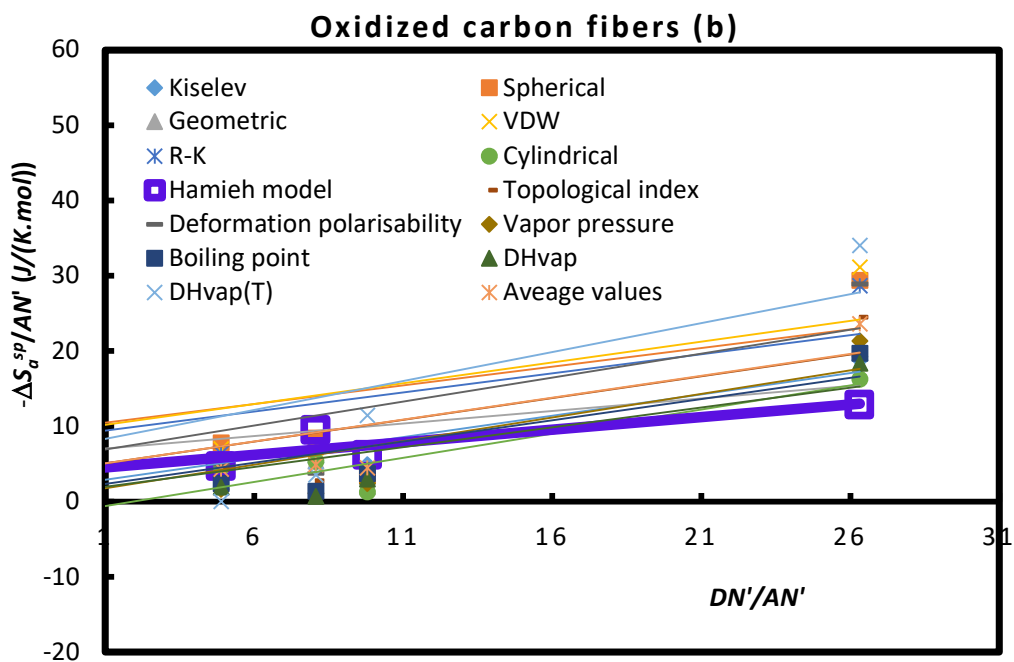

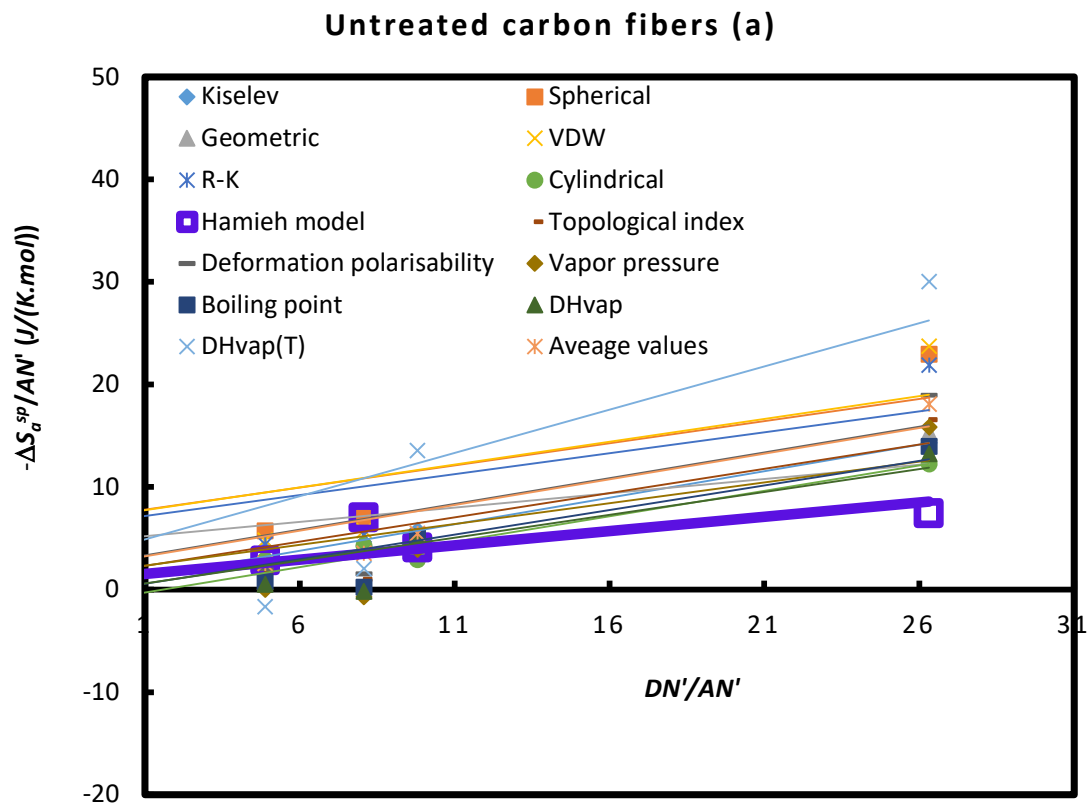

**Figure S6.** Variations of  $\left(\frac{-\Delta S_a^{sp}}{AN'}\right)$  as a function of  $\left(\frac{DN'}{AN'}\right)$  by using the various molecular models and IGC methods for the carbon fibers (a) and (b).
